# Supplementary material for: Fitness cost of reassortment in human influenza
Source: PubMed Central journal article supplement (PMC5675378; doi:10.1371/journal.ppat.1006685), 2017-11-07
Supplement: ppat.1006685.s002.pdf [file ppat.1006685.s002.pdf]

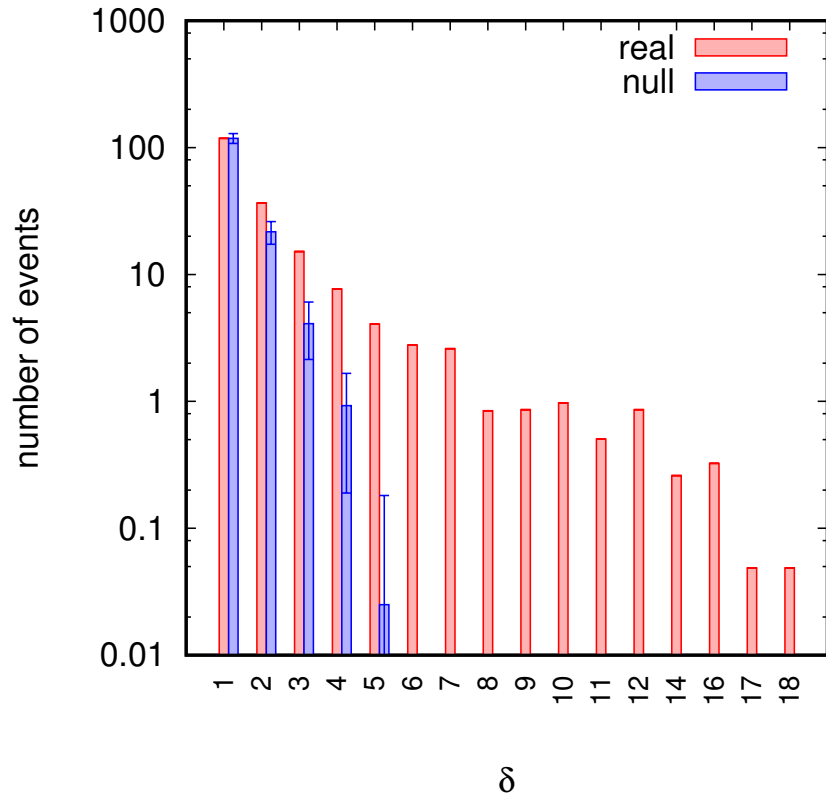

**S2 Fig. Reassortment inference between unpassaged sequences.** Histograms of reported HA-NA reassortment events between unpassaged sequences for different core distances  $\delta$  (red bars) are compared to expected number of false positives (blue bars), which decays exponentially with increasing  $\delta$ . This result is qualitatively comparable with the distance dependence of real events and false positives that we find including in the analyses also strains subjected to passaging.
