# Supplementary material for: Fitness cost of reassortment in human influenza
Source: PubMed Central journal article supplement (PMC5675378; doi:10.1371/journal.ppat.1006685), 2017-11-07
Supplement: ppat.1006685.s006.pdf [file ppat.1006685.s006.pdf]

| event | distance, <i>d</i> | parent clade, <i>p</i>             | parent clade, <i>p'</i>            | reassortant clade, <i>r</i>        |
|-------|--------------------|------------------------------------|------------------------------------|------------------------------------|
| 1*    | 11.5               | 29489,14381,30237,14372,29491      | 14338,3758,14333                   | 14358                              |
| 2     | 8.5                | 154756                             | 134337,145114,148480,144791,132668 | 163337                             |
| 3*    | 15                 | 6631,8200,166347                   | 8978,8977,9217,5090,8981           | 8706,6710,6678                     |
| 4     | 17                 | 142809,140296,137259,160602,131807 | 152656,90466,98995,152503,79676    | 145506                             |
| 5     | 12.5               | 198035                             | 195744,195907,197988,194978,197748 | 198065                             |
| 6     | 12                 | 79650,94769,85831,86055,83861      | 65125,77838,93878,34977,32310      | 86052                              |
| 7     | 4.5                | 152192,152613,152818,152498,152358 | 152291,152817,152255,152392,152775 | 152686                             |
| 8     | 4.5                | 16068                              | 97156,14327,14323,3750,14330       | 16000                              |
| 9*    | 12                 | 86052                              | 85607,90818,94612,94642,93661      | 90054                              |
| 10    | 7                  | 194156,173986,178004,175204,179355 | 172767,170296,169683               | 170296                             |
| 11    | 10.5               | 189816,170207,191802,170197,170701 | 145483,147970,174249,160586,132668 | 191800                             |
| 12    | 5.5                | 137758                             | 142809,140296,137259,160602,131807 | 161491                             |
| 13    | 15.5               | 170266,169497                      | 160279,140419,138011,160321,131805 | 175187                             |
| 14    | 9.5                | 162098,161905,162096,162135,155890 | 145483,147970,174249,160586,132668 | 158821                             |
| 15*   | 21                 | 128700,128654                      | 103313                             | 192795                             |
| 16    | 11.5               | 81387,81399,66705                  | 66704,102802,102662,68571,93892    | 66706                              |
| 17    | 11.5               | 155921                             | 158766,159638,153710,153167,156896 | 163130                             |
| 18    | 7                  | 107846,128072,104125               | 99876,88040,119705                 | 128044                             |
| 19    | 4                  | 194530                             | 193338,193325,195842,195886,197932 | 197913                             |
| 20    | 9                  | 159630,162123,164260,154747        | 134337,145114,148480,144791,132668 | 164218                             |
| 21    | 13                 | 154746                             | 176988,154023,174836,145111,173207 | 161320                             |
| 22    | 9.5                | 194642                             | 164815,165579,162145,164711,167825 | 191815                             |
| 23    | 4                  | 195846                             | 197859,194530,197925,197917,197916 | 197955,197909,197942,197904,197932 |
| 24    | 8.5                | 152165,152812,152248,152363,152278 | 143018,83810,87896,89798,81393     | 152392                             |
| 25*   | 6                  | 6679                               | 9235,5017,6471,9177,8630           | 5015,5032                          |
| 26    | 10                 | 15986                              | 98707,117862,30238,14396,33845     | 90492                              |
| 27    | 11                 | 89668,91142,136596,78771,93667     | 143018,83810,87896,89798,81393     | 83166                              |
| 28*   | 13                 | 115460,115461                      | 111170                             | 115515                             |
| 29    | 9                  | 164985,164983,191803,168905,166842 | 163091,165115,152908,159630,166303 | 191777                             |
| 30    | 4                  | 197888,197905,197964               | 193338,191710,172747,195246,175213 | 197930                             |
| 31    | 9.5                | 5109,6508,5696,7057,6355           | 14254,14247,14253,14252,14266      | 14249                              |
| 32    | 7.5                | 119713,111411,136406,122660,106394 | 101916,122601,121525               | 152345                             |
| 33    | 4.5                | 70811                              | 62803,32221,70811,27632,23843      | 79673                              |
| 34    | 9.5                | 20566                              | 120392,14384,5728,90490,118003     | 20572                              |
| 35    | 14                 | 152464                             | 152758,152192,96104,152291,90810   | 152439                             |
| 36    | 9                  | 77767,26246,23932,76127            | 20786,29631,23281,23270            | 107452                             |
| 37    | 6                  | 84613                              | 29908,32258,28882,15889,19060      | 84614                              |
| 38    | 6.5                | 160943                             | 15483,22763,15558,19707,20684      | 19896                              |
| 39    | 4                  | 191673,194131,172496,169910,176539 | 193359,172580,173245,169126,170030 | 170667                             |
| 40    | 12                 | 65123                              | 70811,62820,32252,150395,32307     | 79650,94769,85831,86055,83861      |
| 41    | 6.5                | 86093                              | 86091,88045,90589                  | 88045                              |
| 42    | 25.5               | 121959,121940,122678,117434,104122 | 117447,99871,117446,103748,104144  | 119881                             |
| 43    | 8.5                | 140701                             | 88021,96020,90603,93713,90646      | 162151                             |
| 44    | 5                  | 104109                             | 128049,94718,128048,136373,90646   | 104134                             |
| 45    | 17                 | 191710,170685,170646,191041,176677 | 134337,145114,157218,148480,156897 | 191786                             |
| 46    | 7                  | 175247                             | 169932,178986,172739,173249,191695 | 197973                             |
| 47    | 19.5               | 188727                             | 132678,160596,153076,153306,139916 | 193314                             |
| 48    | 5.5                | 198011,198006                      | 178978,193175,176501,172555,170431 | 197908                             |
| 49    | 17.5               | 191775                             | 132678,160596,153076,153306,139916 | 194156                             |
| 50    | 10.5               | 168140,173216,174183,172587,171390 | 161899,159526,173051               | 195875,195879                      |
| 51    | 3                  | 132678,160596,153076,153306,139916 | 161899,159526,173051               | 166226                             |
| 52    | 25.5               | 121931,128651,128649,107858,107855 | 134337,145114,157218,148480,156897 | 159618                             |
| 53    | 13                 | 90835,86091,119713,109757,133061   | 118540,93786,85720,88963           | 85722                              |
| 54    | 7                  | 160374,160359,160405,160299        | 134774,148031,160490,160466,148033 | 148059                             |
| 55    | 9.5                | 140897                             | 143018,83810,87896,89798,81393     | 140901                             |
| 56    | 11.5               | 131268,131358,131356,131269,133998 | 88021,90603,90599,94718,90646      | 138002                             |
| 57    | 6.5                | 156905                             | 166290,171388,158968,154764,173207 | 171375                             |
| 58    | 8.5                | 79331                              | 192757                             | 172586                             |

|     |      |                                    |                                     |                                    |
|-----|------|------------------------------------|-------------------------------------|------------------------------------|
| 59  | 11.5 | 120294,99877                       | 117447,99871,117446,103748,104144   | 128072                             |
| 60  | 6    | 66079                              | 62803,19055,118061,19712,23843      | 97483                              |
| 61  | 9.5  | 143015,143014                      | 62803,19055,118061,19712,23843      | 76700                              |
| 62  | 9.5  | 188727                             | 170724,188755,179340,179369,169915  | 192181                             |
| 63  | 7.5  | 117460,117461,103744               | 103248,98651,117449,94724,88040     | 134331                             |
| 64  | 6.5  | 129899,121972,107830,128027,117655 | 98651,121258,107852,122974,88040    | 104113                             |
| 65  | 6    | 171931                             | 170724,188755,179340,179369,169915  | 168903                             |
| 66  | 10   | 123055,122961,118652,100445,100516 | 121258,121936,127833,122932,128053  | 119708                             |
| 67  | 8.5  | 154022,163098,168369,165589,164250 | 121258,121936,127833,122932,128053  | 152955                             |
| 68  | 5    | 168931,170309                      | 170724,188755,179340,179369,169915  | 178093                             |
| 69  | 4.5  | 170638,191812                      | 193338,191710,191674,170724,169915  | 191813                             |
| 70  | 8.5  | 13724                              | 14410,32482                         | 20286                              |
| 71  | 21.5 | 115303,115354,114867,8696          | 114610                              | 5665                               |
| 72  | 7    | 173048                             | 147970,174249,134012,192798,148094  | 173051                             |
| 73  | 11   | 197937,197934                      | 147970,174249,134012,192798,148094  | 197889                             |
| 74* | 42.5 | 5022,9235,9198,5466,6674           | 20810,14305,14327,14323,14321       | 5009,107554                        |
| 75  | 4.5  | 14137                              | 14137                               | 14187                              |
| 76  | 19   | 16064                              | 14384,90490,154552,90544,14394      | 70807                              |
| 77  | 8    | 93799,65120,93914,77779,93900      | 62803,19055,118061,19712,23843      | 93801                              |
| 78  | 6    | 153942                             | 147970,174249,134012,192798,148094  | 154770                             |
| 79  | 10.5 | 83173,152458,93666,152193,152600   | 62803,32221,70811,19055,32251       | 108212                             |
| 80  | 16   | 191786                             | 168783,170701,167130                | 179483                             |
| 81  | 4.5  | 6848,20832,25012,25013,22823       | 113017                              | 8984                               |
| 82  | 16   | 172559                             | 167130,191714,169186                | 170711                             |
| 83  | 5.5  | 191813                             | 191674,170724,188755,179340,169915  | 186617                             |
| 84  | 16   | 177539                             | 168783,170701,167130                | 178965                             |
| 85  | 4.5  | 160950                             | 19055,19712,27632,29908,29574       | 60739                              |
| 86  | 7.5  | 155910                             | 147970,174249,134012,192798,148094  | 162113                             |
| 87  | 17   | 175052,179472,174982,190933,193176 | 176425,173233,171740                | 191932                             |
| 88  | 5    | 161275                             | 147970,174249,134012,192798,148094  | 177541                             |
| 89  | 14.5 | 191789                             | 168897,188817,175028,167920,172766  | 179486                             |
| 90  | 12   | 192166                             | 147970,174249,134012,192798,148094  | 191968                             |
| 91  | 12.5 | 86052                              | 77951,32286,160994,87188,77762      | 79326                              |
| 92  | 8    | 8672,8198,114249,114246            | 5105                                | 114398,114396,110907               |
| 93  | 5    | 98651,99773,122942                 | 122956,99874,99873,122999,122902    | 123005                             |
| 94  | 13.5 | 170843                             | 147970,174249,134012,192798,148094  | 191799                             |
| 95  | 8    | 159133,164603,159141               | 147970,174249,134012,192798,148094  | 164216                             |
| 96  | 12.5 | 161480                             | 122956,99874,99873,122999,122902    | 123069                             |
| 97  | 15.5 | 172583                             | 167961,166459,189816,169089,168899, | 175159                             |
| 98* | 14.5 | 7064,114014                        | 8698,9281,8698,5106                 | 114196                             |
| 99* | 26   | 16012,90502                        | 9078,5007,5637,5508,9064            | 107634,107487,107930,107388,6659   |
| 100 | 7    | 114868                             | 114610                              | 111020                             |
| 101 | 13   | 169946                             | 192798,134337,131805,132579,189622  | 170734,170324,168100,172756,170703 |
| 102 | 4    | 85722                              | 152656,90466,98995,152503,79676     | 85719                              |
| 103 | 10.5 | 142676                             | 152656,90466,98995,152503,79676     | 142677                             |

**S2 Table. List of inferred reassortment events from 1968 to 2015 between HA and NA segments in human influenza A/H3N2.** Column 2: mean nucleotide distance  $d$  between reassortant strain and parent strains. Columns 3-5: representative observed strains in the clades of  $p$ ,  $p'$  and  $r$ , respectively. Each isolate is identified by its number in the online EpiFlu<sup>TM</sup> DATABASE (<http://www.gisaid.org>) identifier (e.g. EPI\_ISL\_7064 is reported here as 7064). Stars indicate events which are reported in literature with large agreement (S1 Text).
